# Supplementary material
Source: MDPI journal article supplement (https://www.mdpi.com/2311-7524/9/3/331)
Supplement: s1 [file s1]

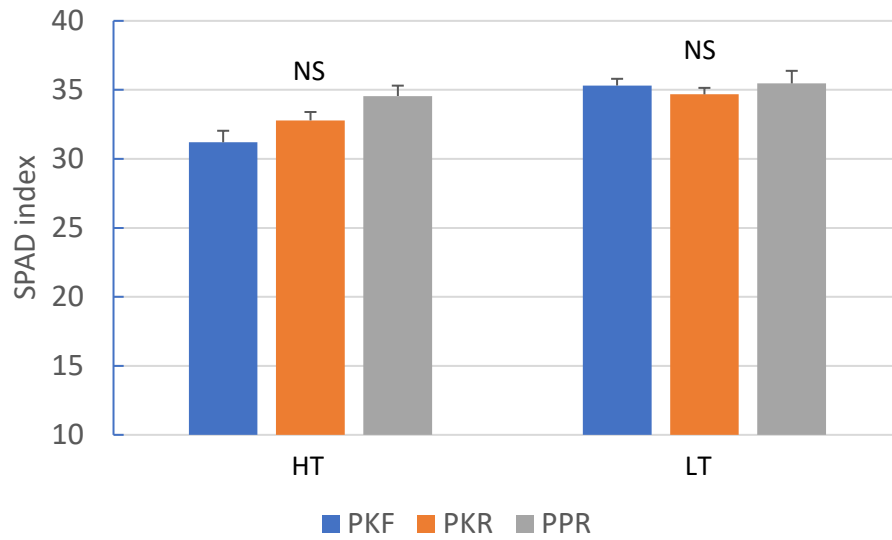

Supplemental Figure S1. Relative chlorophyll content (SPAD index) of lettuce plants grown under three light spectrums (PKF, PKR, and PPR) and under high or low temperature (HT, 30 °C; LT, 21 °C). Three spectrums: PKF (Blue, 8%, green 15%, red 72%, FR 5%), PKR (Blue 8%, green, 15%, red 77%), and PPR (Blue 13%, red 87%). NS indicates no differences among the spectra at the same temperature.
